# Supplementary material
Source: Springer Nature journal article supplement (https://www.springermedizin.de/resource/supplementary/12903_2014_414_MOESM5_ESM.pdf/9517004)

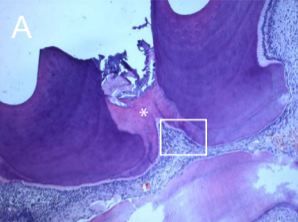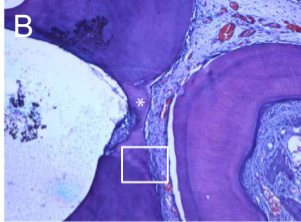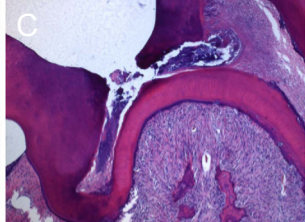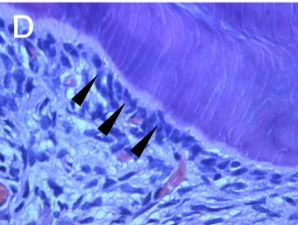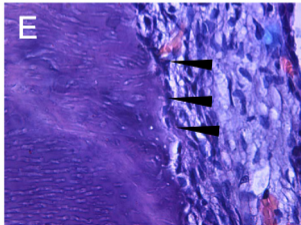

Supplement: MOESM5 [file 9517004]
